# Supplementary material for: Piezoresistance behaviors of p-type 6H-SiC nanowires
Source: Royal Society of Chemistry journal article supplement (doi:10.1039/c1cc14343c), 2011-01-01
Supplement: c1cc14343c.pdf [file c1cc14343c.pdf]

## *Electronic Supplementary Information*

### **Piezoresistance Behaviors of *p*-type 6H-SiC Nanowires**

*Fengmei Gao, Jinju Zheng, Mingfang Wang, Guodong Wei,\* and Weiyou Yang\**

Institute of Materials, Ningbo University of Technology, Ningbo City, 315016, P.R. China

#### ***Experimental Procedure:***

*p*-type 6H-SiC nanowires were synthesized by using catalyst-assisted pyrolysis of polymeric precursors as described in our previous work.<sup>1</sup> The used precursors were obtained by reaction of polyureamethylvinylsilazane (Ceraset, Kion Corporation, USA) and aluminum isopropoxide (AIP, Beijing Bei Hua Fine Chemicals Company, Beijing, China) with a weight ratio of Ceraset:AIP = 98:2. The AIP used here is to introduce the Al atoms for doping SiC nanowires. The obtained polyaluminasilazanes, which were liquid as synthesized, were then solidified by heat-treatment at 260°C for 0.5 hour in N<sub>2</sub>. The solids were crushed into fine powders by high-energy ball milling for 24 hours, with 3wt% of FeCl<sub>2</sub> powder (analytical purity: 99.99%, Beijing Bei Hua Fine Chemicals Company, Beijing, China) additive as the catalyst. The powder mixtures were pyrolyzed in a conventional furnace with a graphite resistance under flowing ultra-high purity Ar (99.99%) of 0.1 MPa. The pyrolysis was carried out at 1450°C for 2 hours followed by furnace-cool to ambient temperature.

---

\* Corresponding author; E-mails: [wgd588@163.com](mailto:wgd588@163.com) (GW), [weiyouyang@tsinghua.org.cn](mailto:weiyouyang@tsinghua.org.cn) (WY)  
Tel: +86-574-87080966

The obtained products were characterized by using field emission scanning electron microscopy (FESEM, S-4800, Hitachi, Japan), and transmission electron microscopy (TEM, JEM-2010, JEOL, Japan). The optical absorption of the nanowires was measured using a UV-3101 double channel spectrometer operated at room temperature (RT). Electronmechanical measurements were performed using a conductive atomic force microscopy (C-AFM, Nanoscope V, Veeco, USA) with Pt/Ir-coated tips (force constant: 0.2 N/m) at RT.

### ***Calculation of the Piezoresistance Coefficient:***

When a uniaxial stress is applied on the SiC nanowire with a top surface of (010), the changes in the resistance of the wire can be given as:

$$\frac{\Delta R}{R} = (1 + 2\nu + \pi_{[010]}Y) \frac{F}{SY} \quad (1)$$

where  $R$  is the resistance under zero stress,  $\nu$  is the Poisson ratio,  $\pi_{[010]}$  is the piezoresistance coefficient along the transverse direction for SiC nanowire lying on the graphite substrate,  $Y$  is the Young's modulus of SiC nanowire,  $F$  is the loading force applied by the AFM tip, and  $S$  is the contact area between the spherical AFM tip and the nanowire. For semiconductor, the resistance changes resulted from dimensional deformation (*i.e.*  $1+2\nu$  item in Eq. (1)) can be ignored. Thus, the Eq. (1) can be simplified as bellow:

$$\pi_{[010]} = \frac{S\Delta R}{RF} \quad (2)$$

Due to the contact area between the spherical AFM tip and nanowire is approximately an ellipse with the major axis  $2a$  along the nanowire and its minor axis  $2b$  along the transverse direction, the  $a$  and  $b$  can be presented as below:<sup>2</sup>

$$a = \sqrt{2\Delta h \cdot r_{tip}} \quad (3)$$

$$b = \sqrt{\frac{2\Delta h \cdot r_{tip} r_{nanowire}}{r_{tip} + r_{nanowire}}} \quad (4)$$

where  $r_{tip}=20$  nm and  $r_{nanowire}=170$  nm are the respective radius of the AFM tip and SiC nanowire, and  $\Delta h$  is the deformation of SiC nanowire along the transverse direction. By using the results of the Hertz model<sup>2</sup> for a cylinder in contact with a spherical tip, the deformation  $\Delta h$  for SiC nanowire along the transverse direction can be expressed as:

$$\Delta h = \left(\frac{9F^2}{16Y_{eff}^2 r_{tip}}\right)^{1/3} Q(r_{tip}) \quad (5)$$

where  $E_{eff}$  is the effective Young modulus, and  $Q$  is the geometric factor. Combining Eq. (1-5), the piezoresistance coefficient  $\pi_{[010]}$  can be given as:

$$\pi_{[010]} = \frac{2\pi r_{tip} \Delta R \sqrt{r_{nanowire}}}{FR \sqrt{r_{tip} + r_{nanowire}}} \left(\frac{9F^2}{16Y_{eff}^2 r_{tip}}\right)^{1/3} Q(r_{tip}) \quad (6)$$

Where the  $E_{eff}$  of SiC nanowires is  $\sim 50$  GPa.<sup>3</sup> Put the value of the constants into Eq. (6), we obtain the final result:

$$\pi_{[010]} = k \frac{\Delta R}{F^{1/3} R} \quad (7)$$

where  $k$  is a constant of *ca.*  $7.94 \times 10^{-9}$ . Consequently, the piezoresistance coefficient  $\pi_{[010]}$  of the nanowire can be calculated out, which falls in the range of 51.2 to  $159.5 \times 10^{-11} \text{ Pa}^{-1}$ .

### References:

1. F. Gao, W. Yang, H. Wang, Y. Fan, Z. Xie and L. An, *Cryst. Growth Des.*, 2008, **8**, 1461.
2. K. L. Johnson, *Contact mechanics*. Cambridge University Press, Cambridge: 1985.
3. Z. Wang, Z. Dai, R. P. Gao, Z. Bai and J. L. Gole, *Appl. Phys. Lett.*, 2000, **77**, 3349.
